# Supplementary material for: Reconstruction of warm season temperatures in central Europe during the past 60,000 years from lacustrine GDGTs
Source: Copernicus journal article supplement (doi:10.5194/egusphere-2023-1960), 2023-09-26
Supplement: Supplementary file 1 [file egusphere-2023-1960-supplement.pdf]

Supplement to:

## Reconstruction of warm season temperatures in central Europe during the past 60,000 years from lacustrine GDGTs

Paul D. Zander<sup>1</sup>, Daniel Böhl<sup>1</sup>, Frank Sirocko<sup>2</sup>, Alexandra Auderset<sup>1,3</sup>, Gerald Haug<sup>1,4</sup>, Alfredo Martínez-García<sup>1</sup>

<sup>1</sup>Climate Geochemistry Department, Max Planck Institute for Chemistry, Mainz, 55128, Germany

<sup>2</sup>Institute of Geosciences, Johannes Gutenberg-University, Mainz, 55122, Germany

<sup>3</sup>School of Ocean and Earth Science, University of Southampton, Southampton SO14 3ZH, United Kingdom

<sup>4</sup>Department of Earth Sciences, ETH Zurich, Zurich, 8092, Switzerland

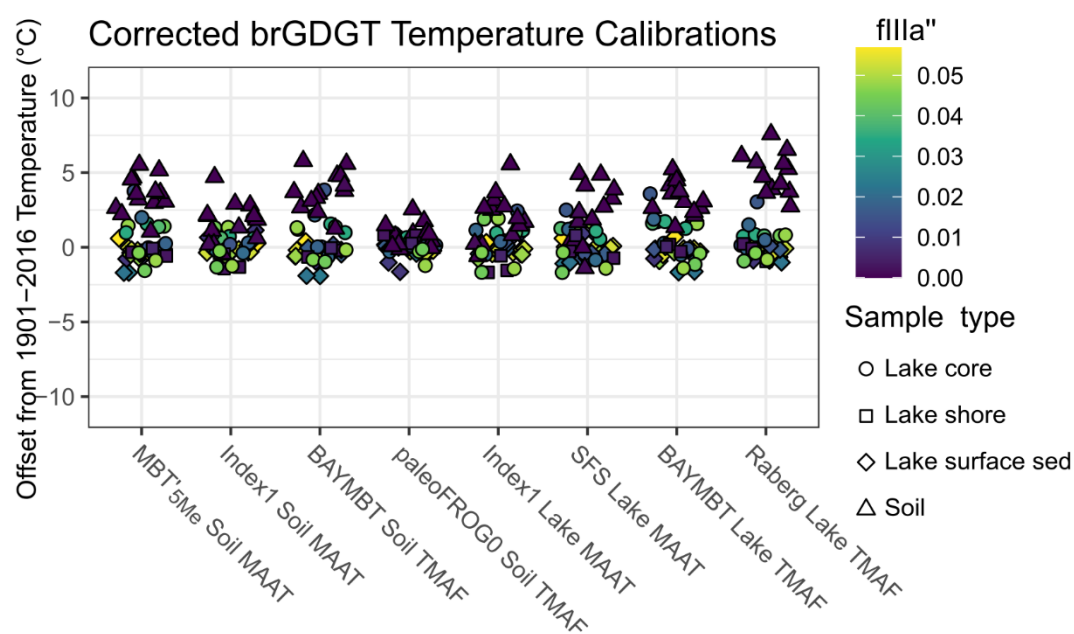

Figure S1: Offsets between brGDGT-inferred temperatures and 1901-2016 temperature data after applying corrections based on fIIIa''. Symbol shape corresponds to sample type, symbol fill corresponds to the fractional abundance of the IIIa'' isomer.

PCA – Biplot: Global brGDGT dataset (Martínez-Sosa et al., 2023)

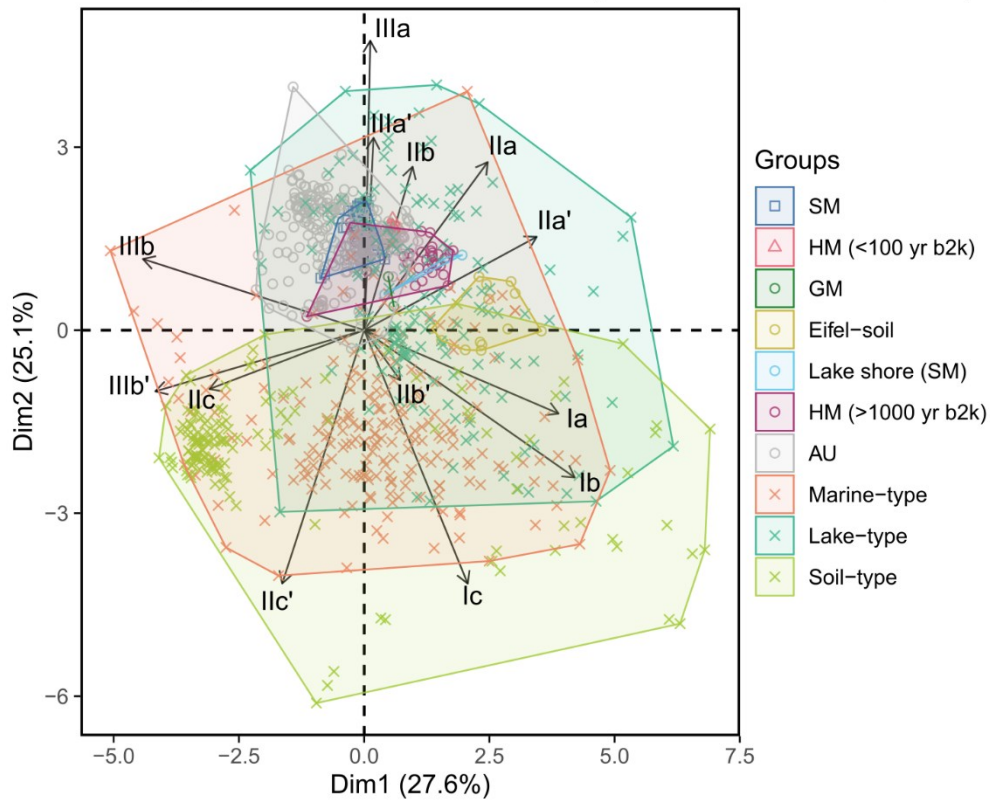

Figure S2: PCA of brGDGT data from Eifel samples and a global compilation (Martínez-Sosa et al., 2023).

**Table S1: Summary of key indices and temperature estimates obtained from 17 separate extractions and measurements of a single sample to test reproducibility of the laboratory and analytical method.**

|                              | <b>MBT'<sub>5Me</sub></b> | <b>BIT</b> | <b>fIIIa''<sup>1</sup></b> | <b>ΣIIIa/ΣIIa</b> | <b>brGDGTs<br/>(ng/g)</b> | <b>isoGDGTs<br/>(ng/g)<sup>2</sup></b> | <b>Cren<br/>(ng/g)<sup>2</sup></b> | <b>BayMBT<br/>(° C)</b> | <b>BayMBT_adj<br/>(° C)</b> | <b>Raberg21<br/>(° C)</b> | <b>Raberg21_adj<br/>(° C)</b> |
|------------------------------|---------------------------|------------|----------------------------|-------------------|---------------------------|----------------------------------------|------------------------------------|-------------------------|-----------------------------|---------------------------|-------------------------------|
| Mean (n=17)                  | 0.193                     | 0.591      | 0.018                      | 2.225             | 1815.2                    | 2749.1                                 | 1248.0                             | 4.37                    | 5.20                        | 6.28                      | 6.53                          |
| Standard<br>Deviation (n=17) | 0.006                     | 0.018      | 0.002                      | 0.193             | 298.7                     | 585.4                                  | 256.0                              | 0.18                    | 0.24                        | 0.10                      | 0.14                          |

<sup>1</sup> fIIIa'' calculated as a fraction of all measured brGDGTs

<sup>2</sup> Includes crenarchaeol and crenarchaeol isomer
